# Supplementary material
Source: MDPI journal article supplement (https://www.mdpi.com/2504-5377/6/2/23)
Supplement: s1 [file s1]

Archive with 1 entries (1 files):
- colloids-1611284-supplementary.pdf
