# Supplementary material
Source: MDPI journal article supplement (https://www.mdpi.com/2504-5377/6/2/23)
Supplement: s1 [file s1 › colloids-1611284-supplementary.pdf]

Supplementary Information

# Relevance of Colloid Inherent Salt Estimated by Surface Complexation Modeling of Surface Charge Densities for Different Silica Colloids

Alok Goel <sup>1,\*</sup> and Johannes Lützenkirchen <sup>2,\*</sup>

<sup>1</sup> Laboratory for Surface Science and Technology, Department of Materials, ETH Zürich, 8093 Zurich, Switzerland

<sup>2</sup> Institute for Nuclear Waste Disposal (INE), Karlsruhe Institute of Technology (KIT), Hermann-von-Helmholtz-Platz 1, 76344 Eggenstein-Leopoldshafen, Germany

\* Correspondence: alok.goel@fhnw.ch (A.G.); johannes.luetzenkirchen@kit.edu (J.L.)

† Current Affiliation: Institute of Polymer Nanotechnology (INKA), FHNW University of Applied Sciences and Arts Northwestern Switzerland, 5210 Windisch, Switzerland

**Citation:** Goel, A.; Lützenkirchen, L. Relevance of Colloid Inherent Salt Estimated by Surface Complexation of Surface Charge Densities for Different silica Colloids. *Colloids Interfaces* **2022**, *6*, 23. <https://doi.org/10.3390/colloids6020023>

Academic Editor: Reinhard Miller, Victor Starov

Received: 09 February 2022

Accepted: 31 March 2022

Published: 06 April 2022

**Publisher's Note:** MDPI stays neutral with regard to jurisdictional claims in published maps and institutional affiliations.

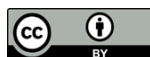

**Copyright:** © 2022 by the authors. Submitted for possible open access publication under the terms and conditions of the Creative Commons Attribution (CC BY) license (<https://creativecommons.org/licenses/by/4.0/>).

## Supplementary Information

Table S1. Normalized residuals and  $pK_a$  results from surface complexation modeling of potentiometric titration-based surface charge density of 5 wt. % Bindzil 360 colloidal silica in different concentrations of CIS. For these simulations, the Stern layer capacitance and the logarithm of the electrolyte binding constant were fixed at  $0.42 \text{ F m}^{-2}$  and 0.3 respectively.

| CIS for 5<br>wt.% in mM | Normalized<br>Residuals | Optimized<br>$pK_a$ |
|-------------------------|-------------------------|---------------------|
| 0                       | 44.39                   | 5.78                |
| 5                       | 18.64                   | 5.98                |
| 10                      | 9.50                    | 6.21                |
| 20                      | 2.84                    | 6.36                |
| 30                      | 1.56                    | 6.44                |
| 36                      | 1.16                    | 6.56                |
| 38                      | 1.07                    | 6.58                |
| <b>40</b>               | <b>1.00</b>             | <b>6.61</b>         |
| 42                      | 1.02                    | 6.62                |
| 44                      | 1.06                    | 6.63                |
| 48                      | 1.30                    | 6.66                |
| 50                      | 1.52                    | 6.67                |
| 60                      | 2.34                    | 6.82                |
| 70                      | 3.29                    | 6.85                |
| 80                      | 4.52                    | 6.92                |
| 100                     | 6.97                    | 7.01                |

Table S2. Predicted  $pK_a$  results from surface complexation modeling of potentiometric titration-based surface charge density of different 5 wt. % silicas with optimum concentrations of CIS. For these simulations, Stern layer capacitance and the logarithm of the electrolyte binding constant were fixed at  $0.42 \text{ F m}^{-2}$  and 0.3, respectively.

| Sample       | Specific surface area<br>( $\text{m}^2/\text{g}$ ) | Optimum<br>CIS (mM) | Best fit<br>$pK_a$ |
|--------------|----------------------------------------------------|---------------------|--------------------|
| Bindzil 360  | 360                                                | 40                  | 6.61               |
| Ludox SM     | 345                                                | 36                  | 6.74               |
| Klebosol 300 | 300                                                | 24                  | 6.08               |

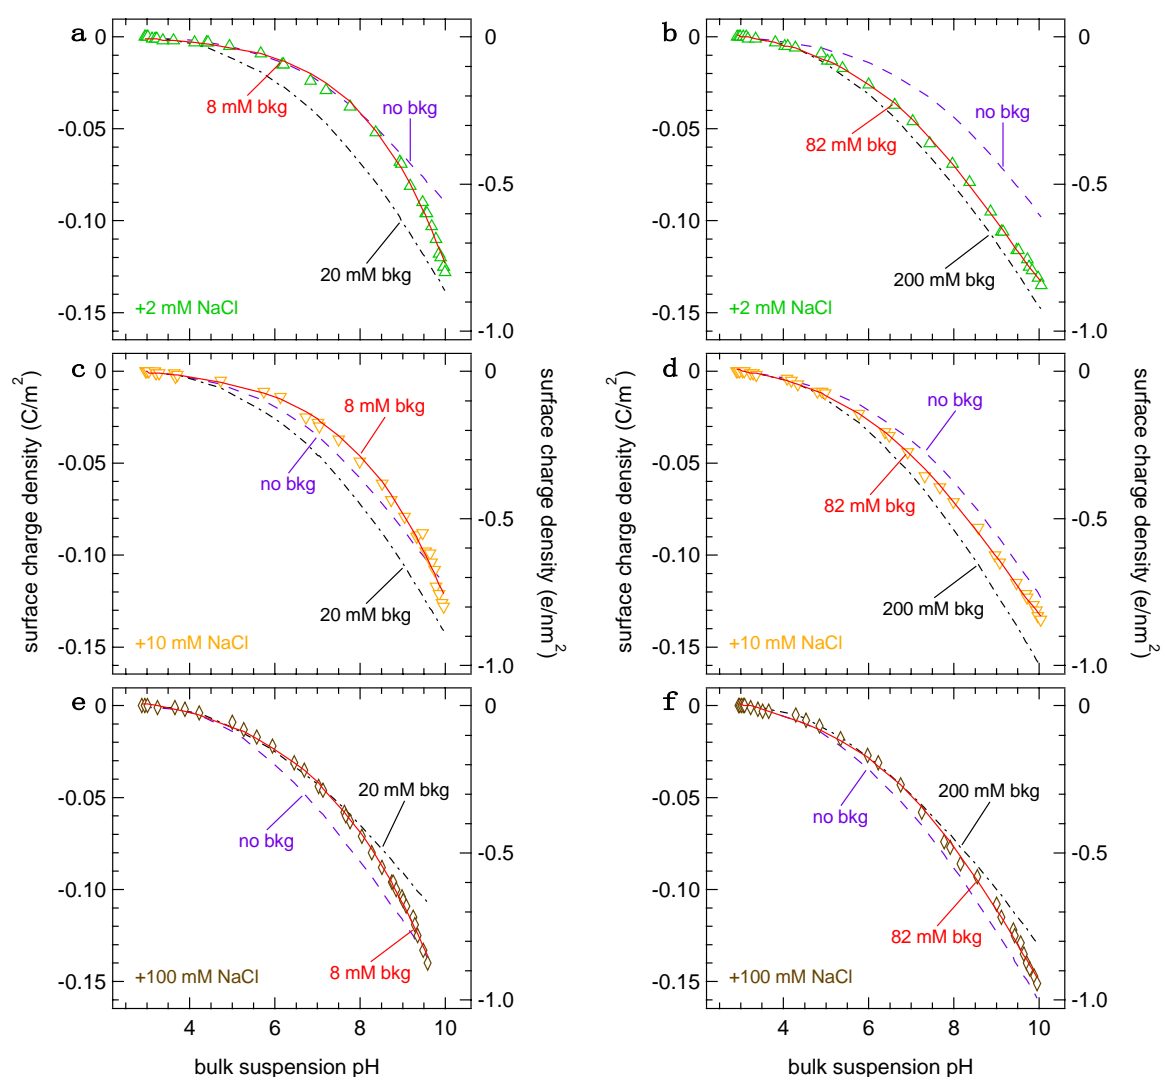

Figure. S1. (a,c,e) SCD for 1 wt. % and (b,d,f) 10 wt. % Bindzil 360 in different amounts of added salt. SCM fits with varying background compared to the SCD in (a,b), 2 mM NaCl (c,d) 10 mM NaCl and (e,f) 100 mM NaCl. For all these simulations the logarithm of the electrolyte binding constant was fixed at 0.3. The Stern layer capacitances for 1 wt. % samples (i.e., a, c, e) and 10 wt. % samples (i.e., b, d, f) were fixed at  $0.42 \text{ F m}^{-2}$  and was  $0.51 \text{ F m}^{-2}$ , respectively.

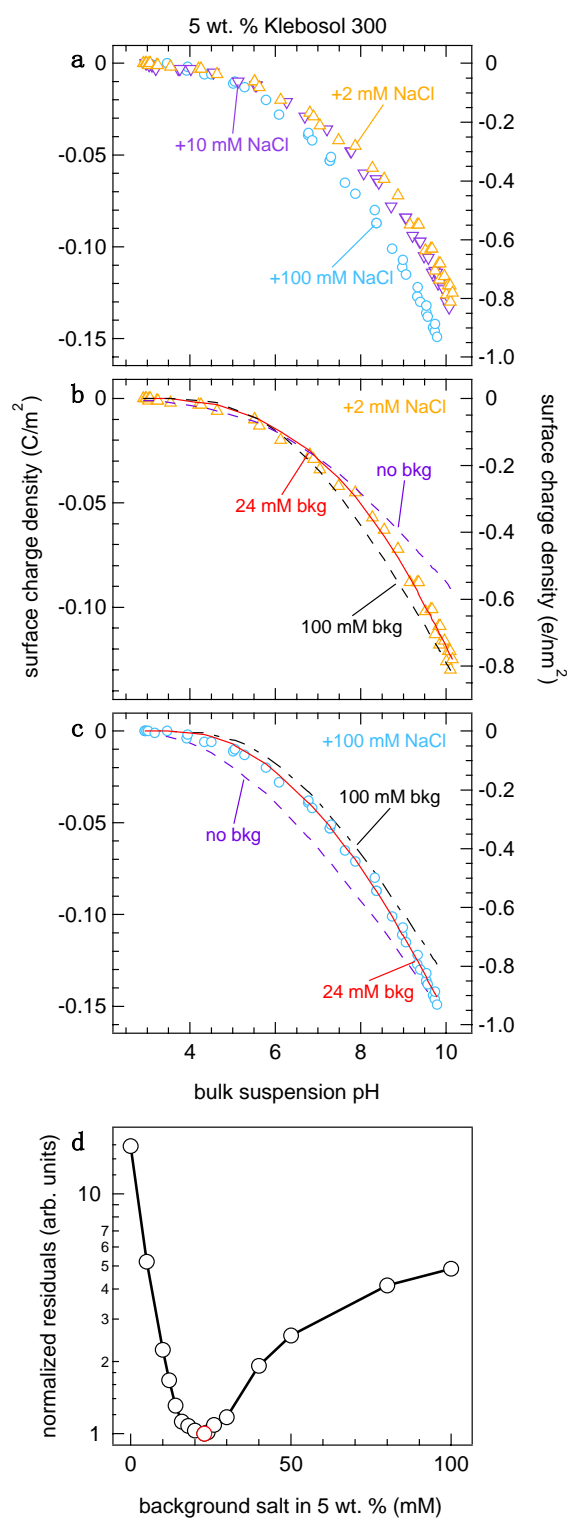

Figure. S2. (a) SCD for 5 wt. % Klebosol 300 in different amounts of added salt. SCM fits with varying background compared to the SCD in (b) 2 mM NaCl (c) 100 mM NaCl. (d) Goodness of fit (residuals) as a function of different amounts of CIS (mM). For these simulations, the Stern layer capacitance and the logarithm of the electrolyte binding constant were fixed at 0.42 F m<sup>-2</sup> and 0.3, respectively.

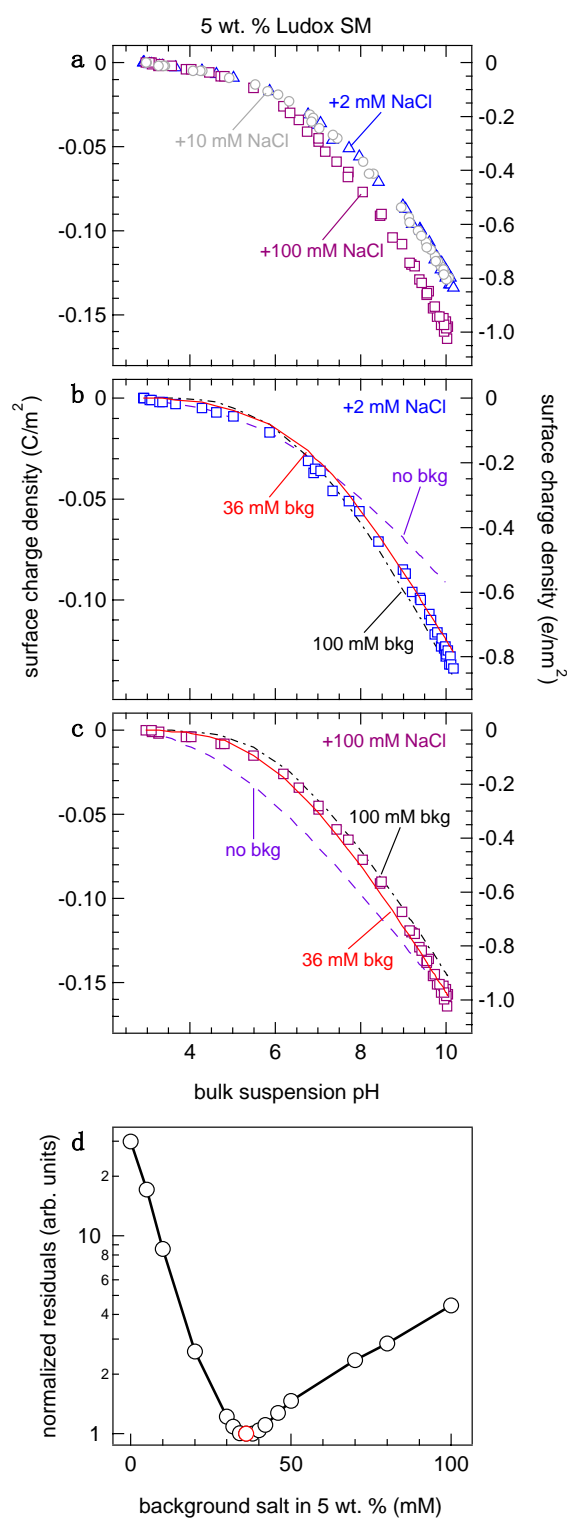

Figure. S3. (a) SCD for 5 wt. % Ludox SM in different amounts of added salt. SCM fits with varying background compared to the SCD in (b) 2 mM NaCl (c) 100 mM NaCl. (d) Goodness of fit (residuals) as a function of different amounts of CIS (mM). For these simulations, the Stern layer capacitance and the logarithm of the electrolyte binding constant were fixed at 0.42 F m<sup>-2</sup> and 0.3, respectively.
